# Supplementary material for: Fruit Quality Traits and Nutritional Value of Tomato F1 Hybrids Derived from Traditional Varieties
Source: Preprints.org preprint supplement (doi:10.20944/preprints202403.0953.v1), 2024-03-18
Supplement: Supplementary file 1 [file supplementary]

**Table S1.** Total yield (Y; kg), mean fruit weight (MFW; g), fruit number (FN), longitudinal diameter (LD; mm), equatorial diameter (ED; mm), chroma (CH), hue (HUE), total soluble solids (TSS; °Brix) and titratable acidity (TA; g L<sup>-1</sup>), for the parental lines. Data are mean ± SD (n=3).

| Parental lines | Y          | MFW      | FN       | LD      | ED       | CH     | HUE    | TSS       | TA        |
|----------------|------------|----------|----------|---------|----------|--------|--------|-----------|-----------|
| P1             | 10,6 ± 1.8 | 295 ± 18 | 40 ± 6   | 87 ± 1  | 85 ± 2   | 26 ± 6 | 38 ± 2 | 6,1 ± 0.6 | 4,1 ± 0.7 |
| P2             | 9,1 ± 1.7  | 291 ± 35 | 24 ± 3   | 56 ± 2  | 92 ± 4   | 23 ± 5 | 59 ± 1 | 6,2 ± 0.2 | 4,8 ± 0.1 |
| P3             | 9,6 ± 1.3  | 365 ± 97 | 26 ± 5   | 60 ± 6  | 101 ± 11 | 27 ± 4 | 40 ± 2 | 7,0 ± 0.6 | 4,4 ± 0.5 |
| P4             | 10,7 ± 2.5 | 321 ± 52 | 30 ± 4   | 60 ± 3  | 96 ± 6   | 33 ± 1 | 37 ± 1 | 6,9 ± 0.6 | 4,4 ± 0.7 |
| P5             | 7,7 ± 1.2  | 77 ± 7   | 104 ± 11 | 51 ± 1  | 52 ± 2   | 24 ± 1 | 64 ± 2 | 7,2 ± 0.2 | 6,2 ± 0.7 |
| P6             | 8,2 ± 2.0  | 285 ± 34 | 24 ± 4   | 68 ± 4  | 86 ± 7   | 30 ± 1 | 45 ± 3 | 5,8 ± 0.2 | 3,5 ± 0.1 |
| P7             | 9,0 ± 1.0  | 291 ± 38 | 27 ± 2   | 58 ± 3  | 94 ± 4   | 36 ± 1 | 49 ± 1 | 6,5 ± 0.2 | 4,7 ± 0.4 |
| P8             | 15,1 ± 1.9 | 288 ± 31 | 90 ± 26  | 64 ± 1  | 87 ± 4   | 34 ± 2 | 51 ± 1 | 5,2 ± 0.1 | 3,0 ± 0.1 |
| P9             | 11,5 ± 2.9 | 189 ± 15 | 62 ± 11  | 58 ± 2  | 78 ± 3   | 38 ± 1 | 52 ± 1 | 6,0 ± 0.6 | 3,4 ± 0.4 |
| P10            | 13,2 ± 1.5 | 178 ± 16 | 80 ± 9   | 55 ± 1  | 81 ± 3   | 42 ± 1 | 51 ± 1 | 6,3 ± 0   | 4,1 ± 0.2 |
| P11            | 8,9 ± 1.1  | 341 ± 35 | 28 ± 2   | 66 ± 7  | 98 ± 3   | 38 ± 1 | 58 ± 2 | 5,7 ± 0.2 | 3,5 ± 0.3 |
| P12            | 6,0 ± 1.3  | 113 ± 6  | 53 ± 10  | 68 ± 1  | 56 ± 3   | 30 ± 6 | 50 ± 2 | 7,0 ± 0.6 | 2,9 ± 0.3 |
| P13            | 7,6 ± 1.5  | 194 ± 8  | 46 ± 8   | 113 ± 3 | 59 ± 2   | 39 ± 0 | 49 ± 1 | 6,7 ± 0.2 | 3,6 ± 0.3 |
| P14            | 7,9 ± 0.8  | 179 ± 28 | 47 ± 6   | 96 ± 3  | 60 ± 6   | 38 ± 1 | 49 ± 1 | 6,2 ± 0.3 | 3,6 ± 0.3 |
