# Supplementary material for: Fruit Quality Traits and Nutritional Value of Tomato F1 Hybrids Derived from Traditional Varieties
Source: Preprints.org preprint supplement (doi:10.20944/preprints202403.0953.v1), 2024-03-18
Supplement: Supplementary file 2 [file supplementary]

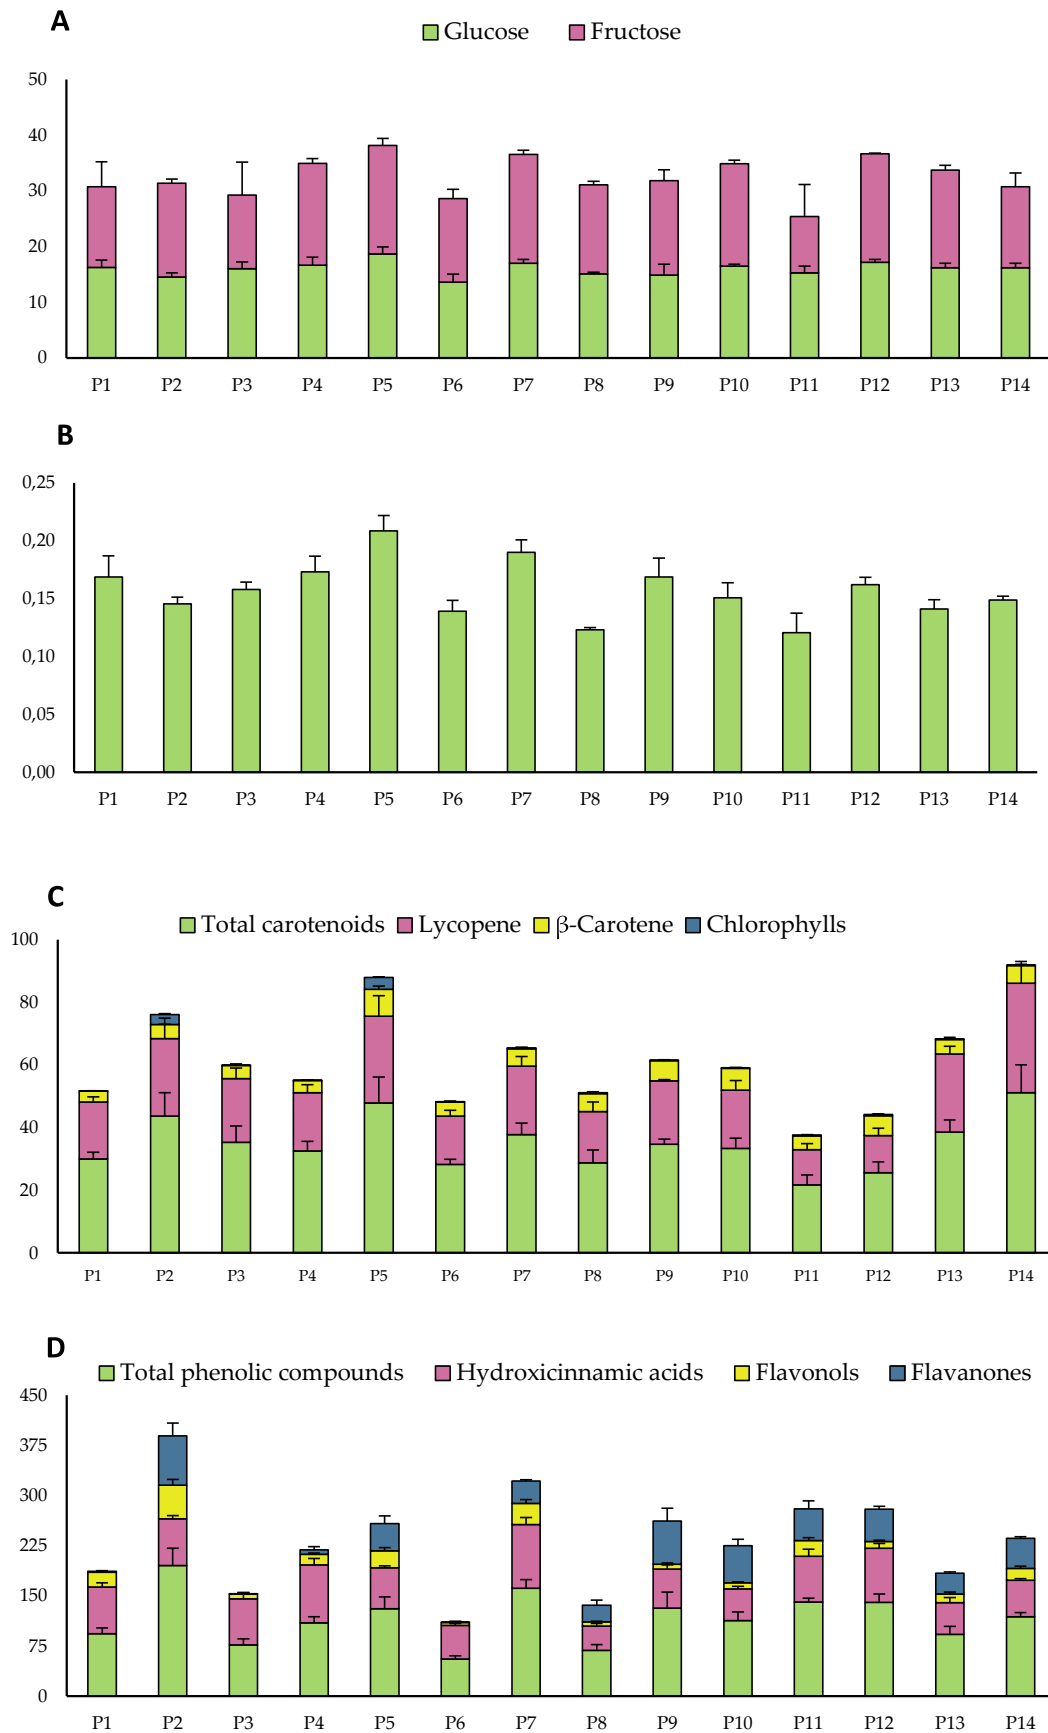

**Figure S2.** A) Concentration of soluble sugars (a; mg g<sup>-1</sup>); B) vitamin C (b; mg g<sup>-1</sup>); C) total carotenoids, lycopene, β-carotene and chlorophylls (c; μg g<sup>-1</sup>) and D) total phenolic compounds, hydroxycinnamic acids,

flavonols and flavanones (d;  $\mu\text{g g}^{-1}$ ) in traditional parental lines (P1 to P14). The bars represent the mean  $\pm$  SE (n = 3).
