# Supplementary material for: Fruit Quality Traits and Nutritional Value of Tomato F1 Hybrids Derived from Traditional Varieties
Source: Preprints.org preprint supplement (doi:10.20944/preprints202403.0953.v1), 2024-03-18
Supplement: Supplementary file 3 [file supplementary]

**Table S2.** Principal Component Analysis in tomato fruit for different agronomic, physical, organoleptic, and bioactive traits.

|                 | <b>PC1</b>    | <b>PC2</b>    | <b>PC3</b> | <b>PC4</b> | <b>PC5</b> | <b>PC6</b> |
|-----------------|---------------|---------------|------------|------------|------------|------------|
| Eigenvalue      | <b>5,952</b>  | <b>4,686</b>  | 3,157      | 2,572      | 2,044      | 1,47       |
| Variability (%) | <b>24,802</b> | <b>19,524</b> | 13,153     | 10,715     | 8,517      | 6,123      |
| Cumulative (%)  | <b>24,802</b> | <b>44,326</b> | 57,479     | 68,194     | 76,711     | 82,835     |
| Factor loading  |               |               |            |            |            |            |
| Y               | <b>-0,311</b> | <b>-0,391</b> | 0,638      | 0,160      | -0,101     | -0,105     |
| MFW             | <b>0,669</b>  | <b>-0,420</b> | 0,284      | 0,374      | -0,243     | 0,249      |
| FN              | <b>-0,766</b> | <b>-0,019</b> | 0,234      | -0,025     | 0,206      | -0,227     |
| ED              | <b>0,609</b>  | <b>-0,367</b> | 0,335      | 0,412      | -0,315     | 0,171      |
| LD              | <b>0,158</b>  | <b>-0,105</b> | -0,576     | -0,446     | 0,406      | 0,172      |
| CH              | <b>0,446</b>  | <b>-0,105</b> | -0,200     | -0,608     | 0,103      | -0,122     |
| HUE             | <b>-0,669</b> | <b>0,236</b>  | 0,172      | -0,031     | -0,341     | 0,040      |
| TSS             | <b>-0,194</b> | <b>0,034</b>  | -0,363     | 0,277      | 0,581      | 0,438      |
| TA              | <b>-0,304</b> | <b>0,221</b>  | -0,072     | 0,601      | 0,300      | 0,295      |
| VC              | <b>0,150</b>  | <b>0,480</b>  | -0,502     | 0,248      | 0,189      | -0,438     |
| HC              | <b>0,523</b>  | <b>0,465</b>  | -0,436     | -0,026     | -0,144     | 0,203      |
| FO              | <b>0,467</b>  | <b>0,595</b>  | -0,163     | 0,140      | -0,367     | -0,017     |
| FA              | <b>0,159</b>  | <b>0,630</b>  | 0,289      | -0,599     | -0,261     | 0,033      |
| GLC             | <b>0,366</b>  | <b>0,344</b>  | 0,123      | 0,584      | -0,081     | -0,511     |
| FRT             | <b>0,285</b>  | <b>0,560</b>  | -0,201     | 0,327      | 0,284      | -0,483     |
| LY              | <b>0,161</b>  | <b>0,514</b>  | 0,635      | -0,196     | 0,439      | 0,057      |
| PHF             | <b>0,689</b>  | <b>0,021</b>  | 0,516      | -0,010     | 0,401      | -0,005     |
| CHL             | <b>-0,525</b> | <b>0,709</b>  | 0,139      | 0,229      | -0,080     | 0,283      |
| PHE             | <b>0,844</b>  | <b>0,108</b>  | 0,350      | 0,010      | 0,226      | 0,096      |
| BC              | <b>-0,619</b> | <b>-0,299</b> | 0,278      | -0,191     | 0,111      | -0,336     |
| VIO             | <b>-0,845</b> | <b>0,392</b>  | 0,102      | -0,073     | -0,086     | 0,047      |
| LU              | <b>-0,409</b> | <b>0,779</b>  | 0,009      | 0,235      | -0,087     | 0,220      |
